# Supplementary material for: Highly efficient hybrid solar cells with tunable dipole at the donor–acceptor interface
Source: Royal Society of Chemistry journal article supplement (doi:10.1039/c4nr02339k), 2014-01-01
Supplement: c4nr02339k1.pdf [file c4nr02339k1.pdf]

Supporting Information

# High Efficient Hybrid Solar Cells with Tunable Dipole at the Donor/Acceptor Interface

*Weifei Fu,<sup>a,‡</sup> Ling Wang,<sup>a,‡</sup> Jun Ling,<sup>a</sup> Hanying Li,<sup>a</sup> Minmin Shi,<sup>a,\*</sup> Jiangeng Xue,<sup>b,\*</sup> Hongzheng Chen<sup>a,\*</sup>*

<sup>a</sup>State Key Laboratory of Silicon Materials, MOE Key Laboratory of Macromolecular Synthesis and Functionalization, Department of Polymer Science and Engineering, Zhejiang University, Hangzhou 310027, P. R. China, <sup>b</sup>Department of Materials Science and Engineering, University of Florida, Gainesville, Florida 32611-6400, United States

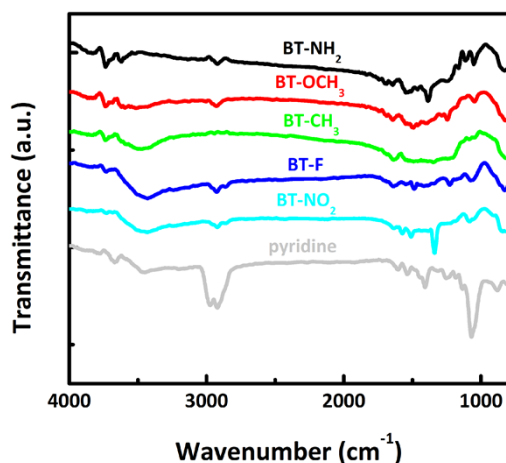

**Figure S1.** Typical Fourier transform infrared spectra of CdSe QD films with various ligands. After ligand exchange with benzenethiols, the intensities of the peaks which can be attributed to C-H (at 2924, 2857  $\text{cm}^{-1}$ ) and C-P (at 1260  $\text{cm}^{-1}$ ) stretching vibrations dramatically decreased, demonstrating the removal of surfactants of TOPO and oleic acid existed on the outer surface of the OA/pyridine capped CdSe QDs.

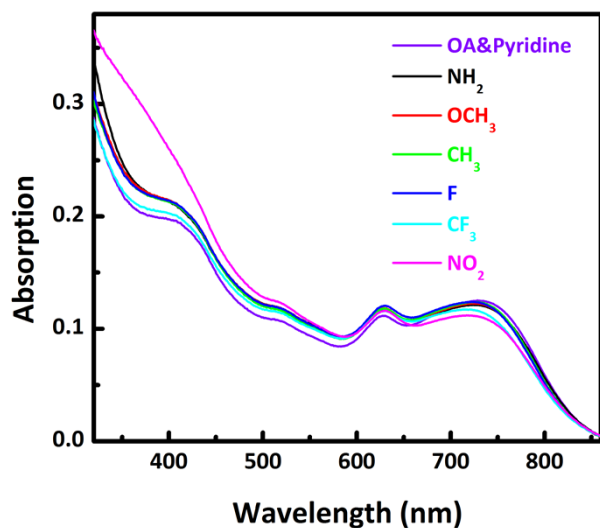

**Figure S2.** UV-Vis absorption spectra of the PCPDTBT/CdSe QDs blend films with different treatments. The absorption of the hybrid films almost remains the same after post-deposition ligand exchange.

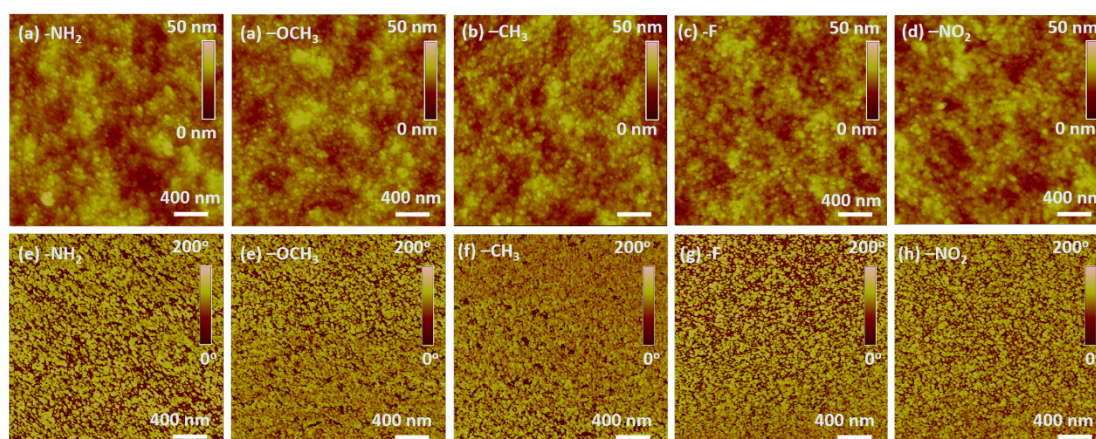

**Figure S3.** Typical atomic force microscope (AFM) images of PCPDTBT:CdSe QDs hybrid films treated by different benzenethiols.
